# Supplementary material for: Protective Factors Modulate the Risk of Beta Amyloid in Alzheimer’s Disease
Source: Hindawi journal article supplement (doi:10.1155/2020/7029642), 2020-10-29

Suppl.Table 1 Factors associated with conversion to AD stratified by brain PET  
Abeta

|                                   | Abeta+<br>Converter<br>N=78 | Non-converter<br>N=162 | Abeta-<br>Converter<br>N=16 | Non-converter<br>N=433 |
|-----------------------------------|-----------------------------|------------------------|-----------------------------|------------------------|
| Age, mean (SD)                    | 73.8 (6.4)                  | 74.1 (6.6)             | 69.6 (7.2)                  | 71.3 (6.9)             |
| Education                         | 16.3 (2.5)                  | 15.9 (2.8)             | 15.4 (2.8)                  | 16.7 (2.5)*            |
| Sex                               |                             |                        |                             |                        |
| Male                              | 47 (60.3)                   | 78 (48.1)              | 9 (56.3)                    | 217 (50.1)             |
| Female                            | 31 (39.7)                   | 84 (51.9)              | 7 (43.7)                    | 216 (49.9)             |
| MMSE, mean (SD)                   | 27.1 (1.8)                  | 28.2 (1.6)*            | 28.5 (1.9)                  | 28.8 (1.4)             |
| ApoE4 <sup>#</sup>                |                             |                        |                             |                        |
| 0                                 | 19 (24.4)                   | 60 (37.0)              | 10 (72.7)                   | 314 (62.5)             |
| 1                                 | 45 (57.7)                   | 80 (49.4)              | 1 (24.5)                    | 106 (25.0)             |
| 2                                 | 14 (18.0)                   | 22 (13.6)              | 1 (2.8)                     | 12 (12.5)              |
| Average brain<br>18F-FDG-PET      | 5.8 (0.63)                  | 6.3 (0.64)*            | 6.0 (0.57)                  | 6.6 (0.56)*            |
| Thickness of<br>entorhinal cortex | 3237.7 (748.8)              | 3715.6 (603.9)*        | 3535.9 (741.3)              | 3828.2 (637.5)         |
| Hippocampal volume                | 6341.8 (892.2)              | 7071.1 (937.0)*        | 6626.3 (1573.9)             | 7473.9 (994.4)         |
| Intracranial volume               | 1549276<br>(180183)         | 1500766<br>(160563)*   | 1503619<br>(170279)         | 1498025<br>(146538)    |
| Whole brain volume                | 1049094<br>(109185)         | 1045248<br>(98472.3)   | 1038108<br>(101047)         | 1061237<br>(102439)    |
| Fusiform gyrus<br>volume          | 17309.4<br>(2615.7)         | 18272.9<br>(2436.2)*   | 18269.8<br>(2070.0)         | 18871.2<br>(2376.1)    |

\*p<0.05; <sup>#</sup>ApoE4 = 0, 1, 2 refers to the number of copies of the ApoE4 allele.

AD, Alzheimer's disease; MMSE, mini-mental state examination.

Suppl. Figure 1 Survival trees to find the optimal cut-off point for AV45 and PDG

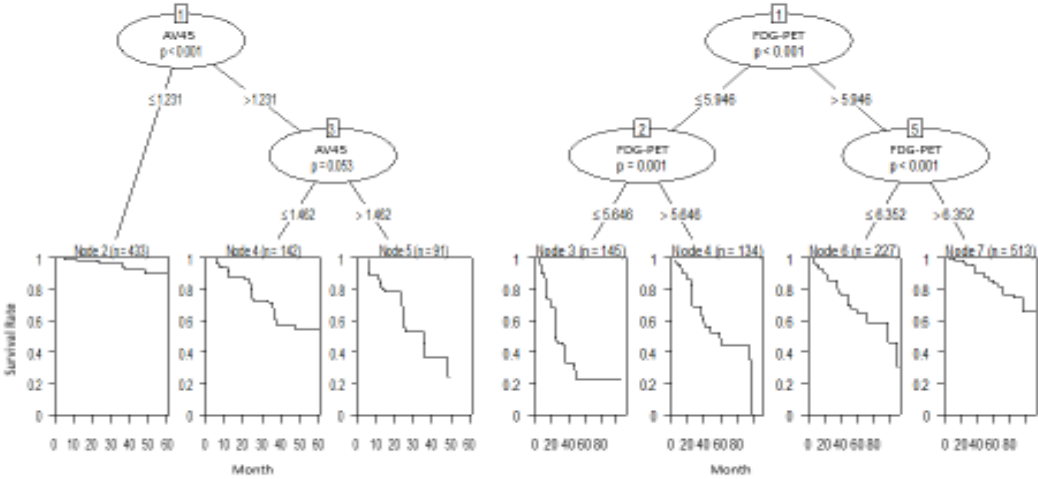

Suppl. Figure 2 Survival curves by AV45 and FDG-PET

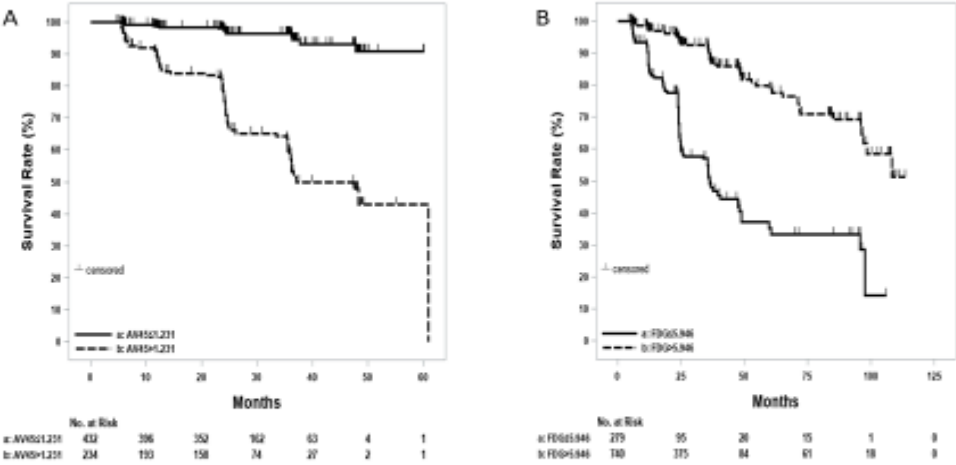

Supplement: f1 [file 7029642.f1.pdf]
